# Supplementary material
Source: HighWire-hosted journal article supplement (http://qualitysafety.bmj.com/highwire/filestream/161592/field_highwire_adjunct_files/2/bmjqs-2021-014225supp003_data_supplement.pdf)

### Appendix 3: Postpartum Hemorrhage Risk Assessment and Stratification

| PPH Risk Assessment & Stratification |                                                                                                                                                                                                                                                                                                                                                                                                                                                                                                                                                                                                                                                                                                                                                                                                                                                                                                                                                   | (Patient label)                                                                                                                                                                                                                                                                                                                                                                     |
|--------------------------------------|---------------------------------------------------------------------------------------------------------------------------------------------------------------------------------------------------------------------------------------------------------------------------------------------------------------------------------------------------------------------------------------------------------------------------------------------------------------------------------------------------------------------------------------------------------------------------------------------------------------------------------------------------------------------------------------------------------------------------------------------------------------------------------------------------------------------------------------------------------------------------------------------------------------------------------------------------|-------------------------------------------------------------------------------------------------------------------------------------------------------------------------------------------------------------------------------------------------------------------------------------------------------------------------------------------------------------------------------------|
|                                      | Risk Factor                                                                                                                                                                                                                                                                                                                                                                                                                                                                                                                                                                                                                                                                                                                                                                                                                                                                                                                                       | Interventions                                                                                                                                                                                                                                                                                                                                                                       |
| Low Risk                             | <ul style="list-style-type: none"> <li><input type="checkbox"/> Singleton</li> <li><input type="checkbox"/> ≤4 prior vaginal births</li> <li><input type="checkbox"/> 0-1 prior cesareans</li> <li><input type="checkbox"/> No known bleeding disorder</li> <li><input type="checkbox"/> No history of PPH</li> </ul>                                                                                                                                                                                                                                                                                                                                                                                                                                                                                                                                                                                                                             | <ul style="list-style-type: none"> <li>✓ T&amp;S if indirect coombs (IDC) negative</li> <li>✓ T&amp;C if IDC positive</li> <li>✓ Postpartum oxytocin for 4 hours</li> </ul>                                                                                                                                                                                                         |
| Medium Risk                          | <ul style="list-style-type: none"> <li><input type="checkbox"/> BMI ≥ 40 kg/m<sup>2</sup></li> <li><input type="checkbox"/> 2 or more prior cesareans OR 1 uterine incision (myomectomy)</li> <li><input type="checkbox"/> History of PPH</li> <li><input type="checkbox"/> EFW &gt; 4,000 g</li> <li><input type="checkbox"/> Multiple gestation</li> <li><input type="checkbox"/> &gt;4 prior vaginal deliveries</li> <li><input type="checkbox"/> Intrapartum magnesium sulfate administration</li> <li><input type="checkbox"/> Black/African American</li> <li><input type="checkbox"/> Jehovah's Witness or any woman who refuses blood products</li> <li><input type="checkbox"/> Chorioamnionitis</li> <li><input type="checkbox"/> Hgb &lt; 9.0 g/dl</li> <li><input type="checkbox"/> Hct &lt; 30%</li> <li><input type="checkbox"/> Platelets &lt; 100,000</li> <li><input type="checkbox"/> Large uterine fibroids &gt;5cm</li> </ul> | <p><u>One Medium Risk Factor:</u></p> <ul style="list-style-type: none"> <li>✓ T&amp;S if IDC negative</li> <li>✓ T&amp;C if IDC positive</li> <li>✓ Discuss potential PPH interventions with patient and RN</li> <li>✓ Postpartum oxytocin for 8 hours</li> </ul> <p><u>Two Medium Risk Factors:</u></p> <ul style="list-style-type: none"> <li>✓ T&amp;C 2 Units PRBCs</li> </ul> |
| High Risk                            | <ul style="list-style-type: none"> <li><input type="checkbox"/> Known coagulopathy</li> <li><input type="checkbox"/> Active bleeding at admission</li> <li><input type="checkbox"/> Placental abruption</li> <li><input type="checkbox"/> Placenta previa or low-lying placenta</li> <li><input type="checkbox"/> Suspected placenta accreta spectrum disease</li> </ul>                                                                                                                                                                                                                                                                                                                                                                                                                                                                                                                                                                          | <ul style="list-style-type: none"> <li>✓ T&amp;C 4 units PRBCs</li> <li>✓ Discuss potential PPH interventions with patient and RN</li> <li>✓ Extended recovery for 4 hours</li> <li>✓ Postpartum oxytocin for 12 hours</li> </ul>                                                                                                                                                   |

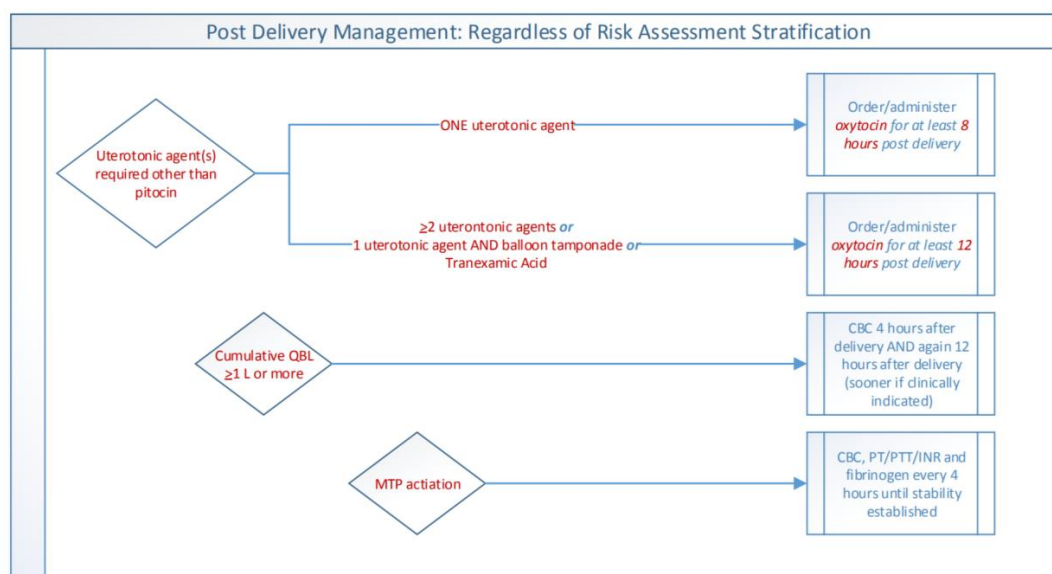

Supplement: bmjqs-2021-014225supp003_data_supplement.pdf [file bmjqs-2021-014225supp003_data_supplement.pdf]
